# Supplementary material for: Comparison of Balanced Crystalloid Solutions: A Systematic Review and Meta-Analysis of Randomized Controlled Trials
Source: PubMed Central journal article supplement — Crit Care Explor. 2021 May 14;3(5):e0398. doi: 10.1097/CCE.0000000000000398 (PMC8133105; doi:10.1097/cce.0000000000000398), 2021-05-14
Supplement: cc9-3-e0398-s001.pdf [file cc9-3-e0398-s001.pdf]

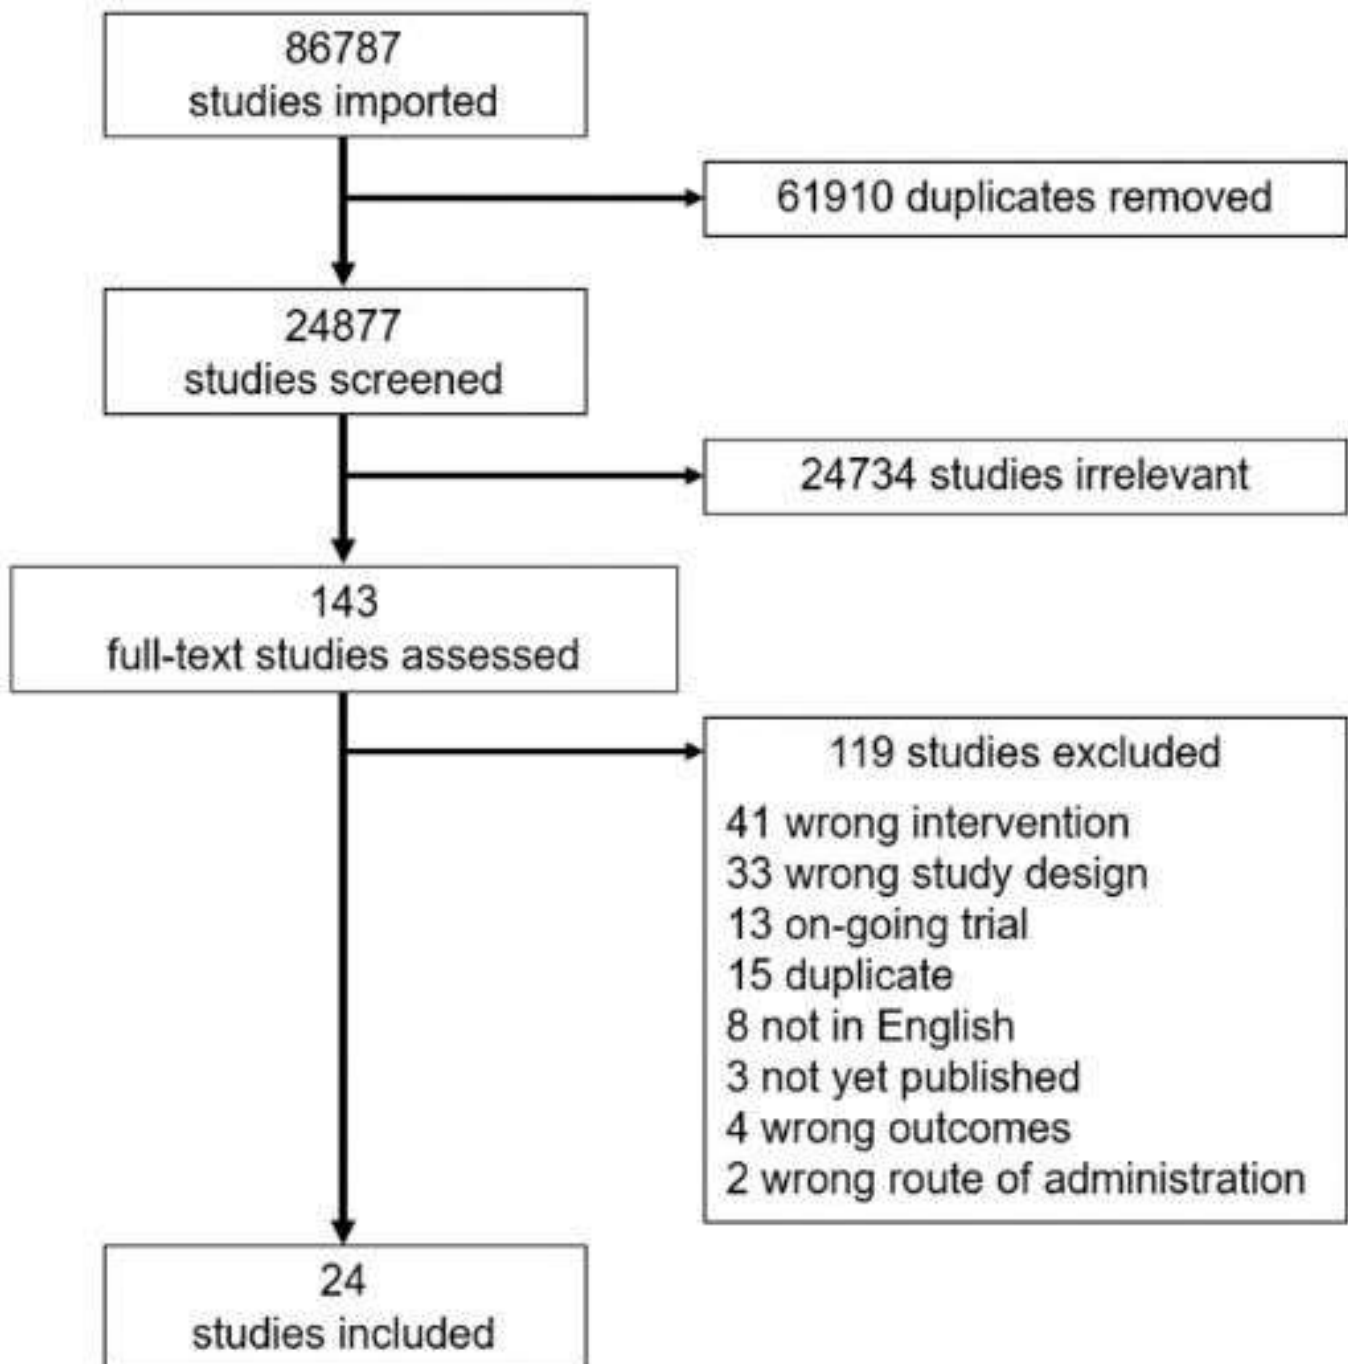

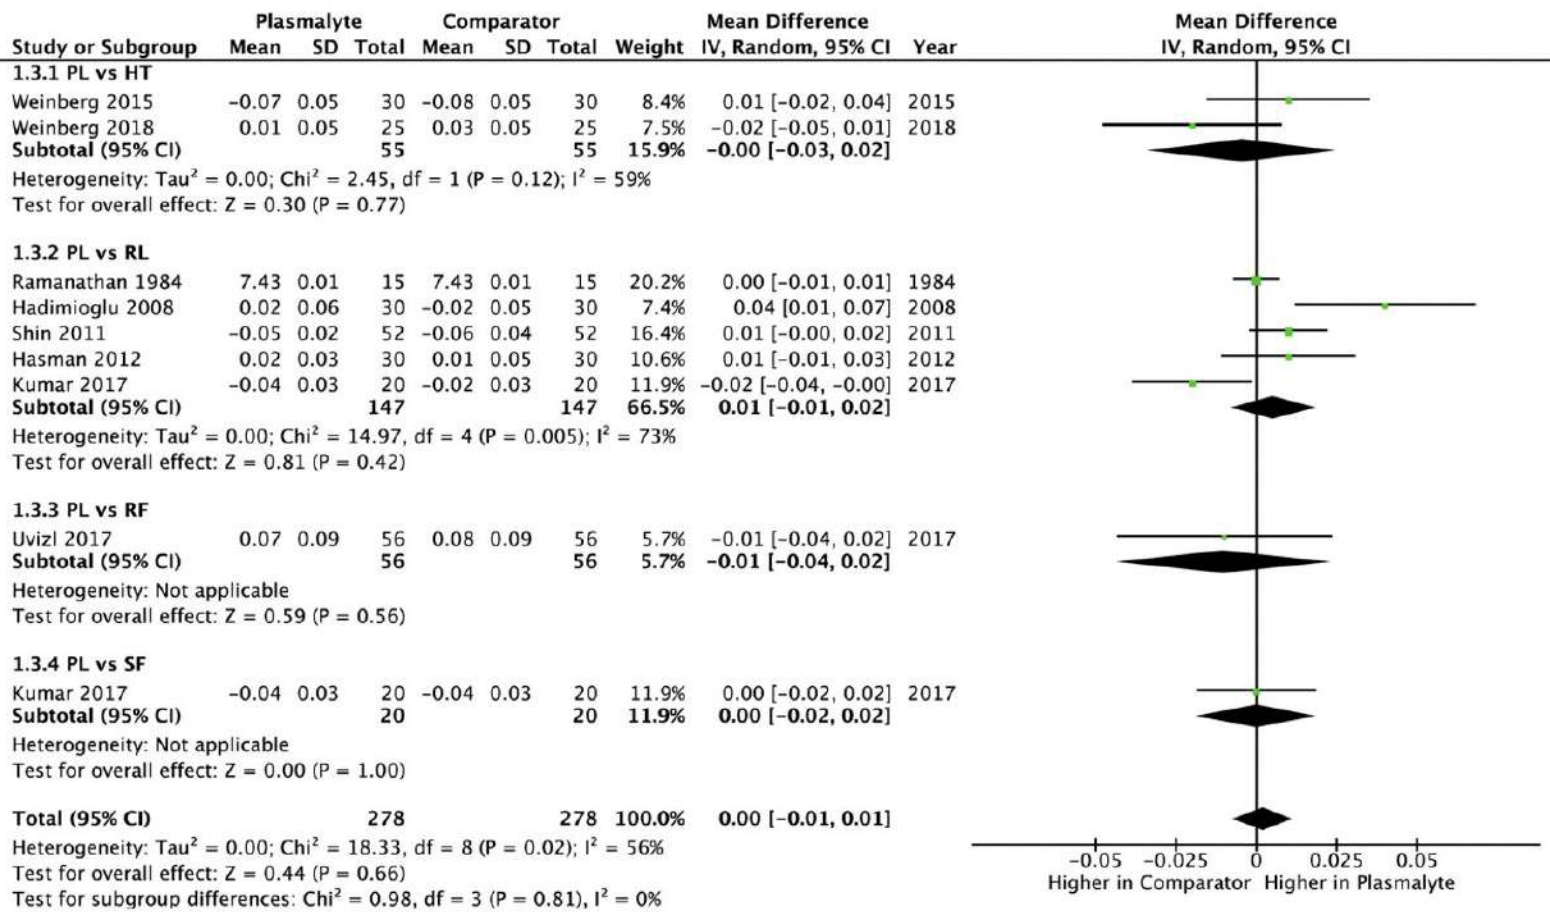

Legend: PL, Plasmalyte; HT, Hartmann's; RL, Ringer's Lactate; RF, Ringerfundin; SF, Sterofundin

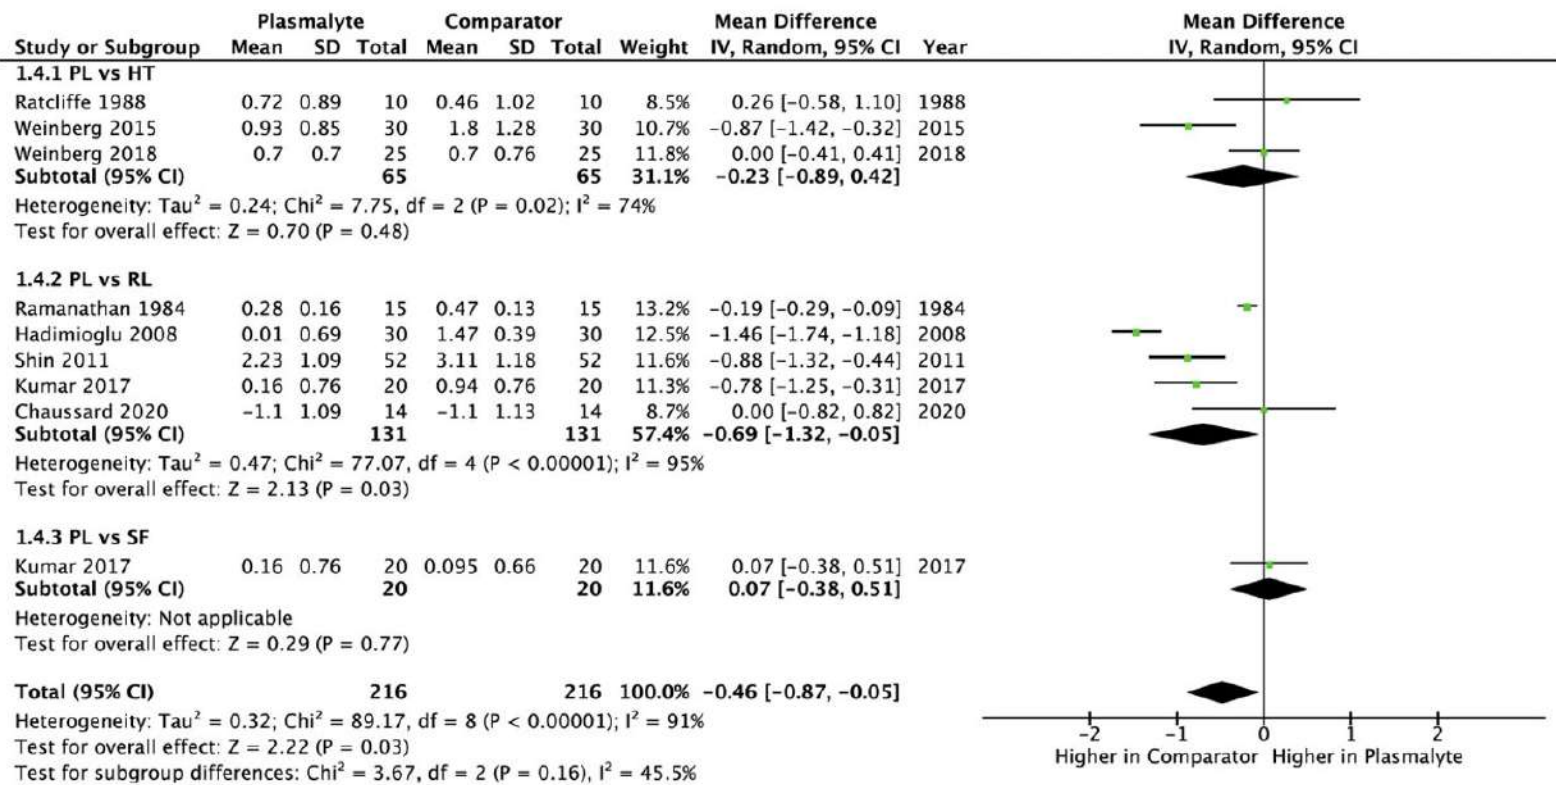

Legend: PL, Plasmalyte; HT, Hartmann's; RL, Ringer's Lactate; SF, Sterofundin

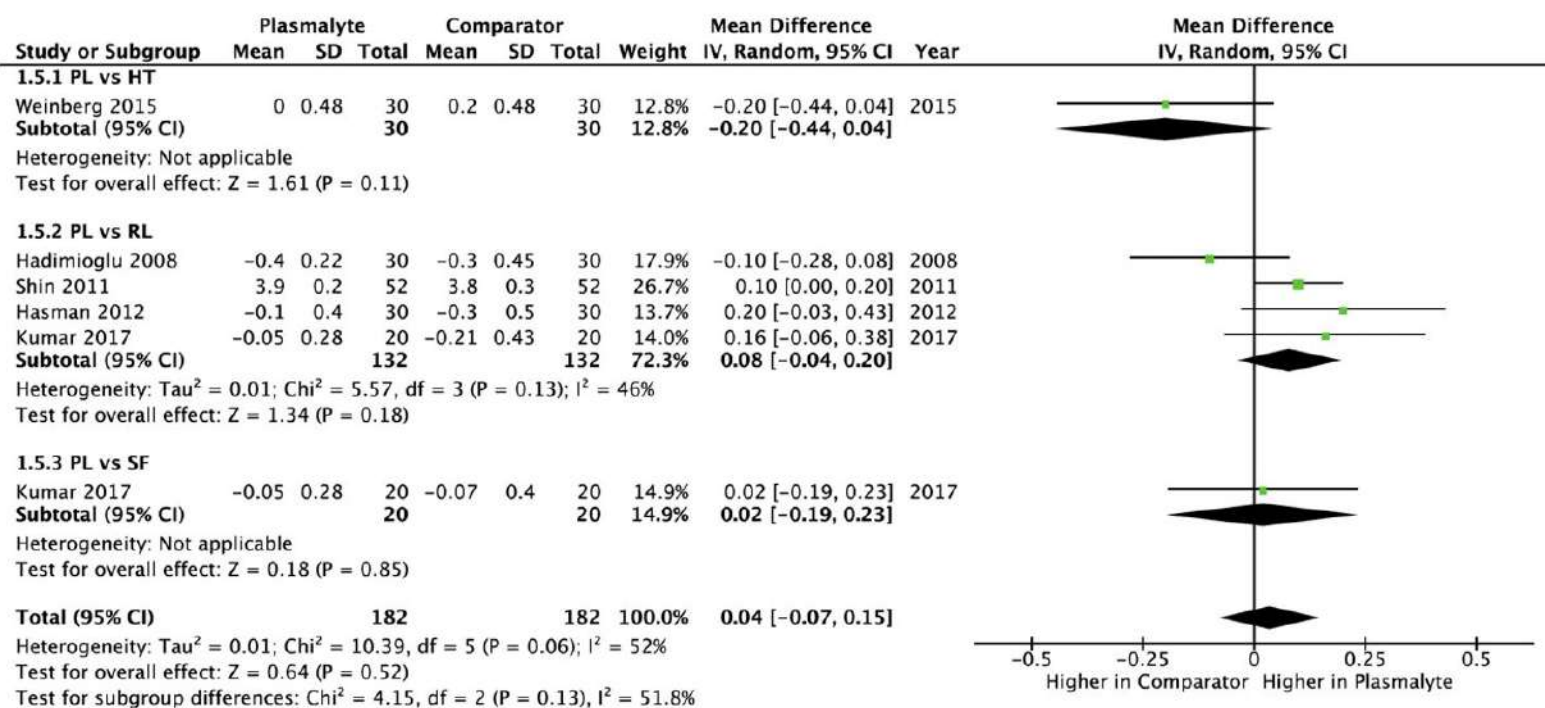

Legend: PL, Plasmalyte; HT, Hartmann's; RL, Ringer's Lactate; SF, Sterofundin
